# Supplementary material for: Revealing the mechanism ofFructus meliae toosendan-induced liver injury in mice by integrating microRNA and mRNA-based toxicogenomics data
Source: Royal Society of Chemistry journal article supplement (doi:10.1039/c5ra10112c), 2015-01-01
Supplement: c5ra10112c1.pdf [file c5ra10112c1.pdf]

*Supplementary information for:*

**Revealing the Mechanism of *Melia Toosendan* Fruit-Induced Liver  
Injury in Mice by Integrating microRNA and mRNA-Based  
Toxicogenomics data**

Cai Ji<sup>a#</sup>, Jie Zheng<sup>a#</sup>, Wei Tong<sup>a</sup>, Xiaoyan Lu<sup>a</sup>, Xiaohui Fan<sup>a\*</sup>, Yue Gao<sup>b\*</sup>

<sup>a</sup> Pharmaceutical Informatics Institute, College of Pharmaceutical Sciences, Zhejiang University, Hangzhou 310058, China

<sup>b</sup> Department of Pharmacology and Toxicology, Beijing Institute of Radiation Medicine, Beijing 100850, China.

#: the authors contributed equally to this study.

\*Correspondence should be addressed to Dr. Xiaohui Fan ( E-mail: [fanxh@zju.edu.cn](mailto:fanxh@zju.edu.cn),  
Tel/Fax: 86-579-88208596) or Dr. Yue Gao (E-mail: [gaoyue@bmi.ac.cn](mailto:gaoyue@bmi.ac.cn), Tel/Fax: 86-  
10-6691312)

Supplementary Table S1.a: sequences of primer for mRNA

| <b>gene name</b> | <b>Forward primer</b> | <b>Reverse primer</b> |
|------------------|-----------------------|-----------------------|
| Fmo3             | AAGCCTATGAAGACGCGTG   | GGACTTATGCCCACTGCAGAT |
| Cyp2b9           | AAGCGCATTTGTCTTGGTGAA | CTACCAATGGCCTGGTTTCC  |
| Cyp4a14          | GCCATTCTCAGGAGGATCAA  | GTATTGCAGGCAGCAGACCTC |
| Cyp4a12a         | TCTCGATTTGCACCAGGGT   | GCAGCATGCCATTTGAGCT   |
| Gadd45a          | TGTGCTGGTGACGAACCCA   | GTGCAGTTGAACTCGGCCCT  |
| Elovl3           | ACATCTGGAGGCAGGAGAA   | CCATACAGGGAGGTACCCT   |
| Igfbp1           | CAGTGTGAGACATCCCTGG   | AAAATGGTGTGCTCCAGAG   |
| Ugt2b38          | ATCACCACGACCAGCCTA    | TGAACAAGAGGCACTTTACAG |
| Slco1a1          | CTCCAGACACTGAACTTGC   | TCCATTCATGGCCTTGAC    |
| Hsd3b5           | CGCCTCTTGATCACAGTGG   | TAACACCCAGGGCCATGTC   |
| GAPDH            | ACCAGGTTGTCTCCTGCGA   | CAGTGCCTTGCTGGGGTG    |

Supplementary Table S1.a: sequences of primer for mRNA

| <b>miRNA name</b> | <b>5'-3' primer</b>     |
|-------------------|-------------------------|
| miR-3082-5p       | GACAGAGTGTGTGTGCTGTGT   |
| miR-574-5p        | TGAGTGTGTGTGTGTGAGTGTGT |
| miR-3102-5p       | GTGAGTGGCCAGGGTGGGGCTG  |
| U6                | CAAGGATGACACGCAAATTCG   |

Supplementary Table S2.a: Lists of genes up-regulated upon FMT-treatment

| Genbank Acc | GENENAME                   | P      | Fold Change |
|-------------|----------------------------|--------|-------------|
| NM_008030   | Fmo3                       | 0.0002 | 105.324     |
| BB129488    | Cux2                       | 0.0034 | 52.580      |
| NM_023135   | Sult1e1                    | 0.0003 | 27.309      |
| BM122014    | EG624219                   | 0.0001 | 23.215      |
| AI266897    | AI132709                   | 0.0003 | 22.291      |
| NM_010000   | Cyp2b9 ///<br>LOC100047700 | 0      | 21.607      |
| NM_020565   | Sult3a1                    | 0.0034 | 21.119      |
| NM_009014   | Rad51l1                    | 0.0009 | 17.252      |
| AI327006    | Cyp4a14                    | 0.0043 | 13.995      |
| NM_007836   | Gadd45a                    | 0.0029 | 12.593      |
| U42467      | Lepr                       | 0.0164 | 12.555      |
| BB667721    | Thrsp                      | 0.0018 | 11.997      |
| NM_013703   | Vldlr                      | 0.0025 | 10.310      |
| X14607      | Lcn2                       | 0.0043 | 10.263      |
| BG065305    |                            | 0.0077 | 9.885       |
| NM_007804   | Cux2                       | 0.0284 | 9.439       |
| BQ266582    | Shroom1                    | 0.0116 | 8.955       |
| BB197269    | Abcd2                      | 0.0001 | 8.867       |
| BC010769    | Apoa4                      | 0      | 7.929       |
| BI656658    | Nav2                       | 0.0002 | 7.714       |
| AJ132857    | BC014805                   | 0.0262 | 7.711       |
| NM_007913   | Egr1                       | 0.0085 | 7.448       |
| NM_007705   | Cirbp                      | 0      | 7.322       |
| AI503879    | Nipal1                     | 0.0001 | 7.187       |
| BC010747    | Cyp4a10 /// Cyp4a31        | 0.0002 | 7.179       |
| NM_134256   | AB056442                   | 0.0014 | 7.055       |
| NM_011994   | Abcd2                      | 0      | 7.048       |
| AV333363    | Vldlr                      | 0.0002 | 7.014       |
| AK015487    | 4930459C07Rik              | 0.0025 | 7.003       |
| U97073      | Prtn3                      | 0.0075 | 6.888       |
| AW456685    | Abcd2                      | 0.0015 | 6.859       |
| AK014427    | Nipal1                     | 0.0004 | 6.565       |
| AA796766    | Mt2                        | 0.0036 | 6.463       |
| BM246564    | Pde4b                      | 0.024  | 6.430       |
| AJ132857    | BC014805                   | 0.0435 | 6.218       |
| BB261367    | Acly                       | 0.0036 | 6.099       |
| BB748443    | Chrna4                     | 0.0185 | 6.088       |
| AF127033    | Fasn                       | 0.0198 | 6.084       |
| BB727879    |                            | 0.0451 | 5.944       |
| AV021656    | Akr1b7                     | 0.002  | 5.942       |
| BB433798    | Lasp1                      | 0      | 5.934       |

| <b>Genbank Acc</b> | <b>GENENAME</b> | <b>P</b> | <b>Fold Change</b> |
|--------------------|-----------------|----------|--------------------|
| BC010829           | Acnat2          | 0.0002   | 5.783              |
| NM_013869          | Tnfrsf19        | 0.0002   | 5.713              |
| BC025870           | Slu7            | 0.0012   | 5.497              |
| L08431             | Vcam1           | 0.0019   | 5.473              |
| BB222737           | Serpina7        | 0.0026   | 5.197              |
| BB554288           | Cxcl1           | 0.0182   | 5.139              |
| NM_009127          | Scd1            | 0.023    | 5.114              |
| NM_026524          | Mid1ip1         | 0.0007   | 5.094              |
| AV027367           | Apoa4           | 0        | 4.987              |
| U43884             | Id1             | 0.0005   | 4.903              |
| NM_013692          | Klf10           | 0.0166   | 4.857              |
| BM124366           | Lepr            | 0.0204   | 4.802              |
| BG297411           |                 | 0        | 4.716              |
| BE985366           | Prelid2         | 0        | 4.644              |
| AI326423           | Sreb1           | 0        | 4.605              |
| NM_018887          | Cyp39a1         | 0.0001   | 4.572              |
| AI882525           | Cd47            | 0.0076   | 4.450              |
| BF019883           | Id2             | 0        | 4.383              |
| AV009267           | Foxq1           | 0.0025   | 4.335              |
| BB326566           | Tmie            | 0.0085   | 4.306              |
| AA717142           | Mkxn1           | 0        | 4.272              |
| NM_013809          | Cyp2g1          | 0.0001   | 4.270              |
| NM_013602          | Mt1             | 0.0059   | 4.217              |
| AW538350           |                 | 0.0004   | 4.216              |
| BB831725           | Socs3           | 0.0024   | 4.189              |
| NM_010496          | Id2             | 0.0001   | 4.136              |
| BC018375           | Hes1            | 0.0001   | 4.121              |
| BM237750           |                 | 0        | 4.114              |
| BB241535           | Socs3           | 0.0032   | 4.105              |
| BC003305           | Lpl             | 0.0059   | 4.079              |
| NM_008321          | Id3             | 0.0001   | 4.051              |
| BI456232           | Acly            | 0.0199   | 4.011              |
| BB518868           | Adora1          | 0.0098   | 3.932              |
| NM_054088          | Pnpla3          | 0.0364   | 3.914              |
| NM_007706          | Socs2           | 0.041    | 3.898              |
| NM_007474          | Aqp8            | 0.0168   | 3.893              |
| NM_026335          | Lce1h           | 0.0226   | 3.835              |
| NM_008176          | Cxcl1           | 0.0348   | 3.809              |
| BM119402           |                 | 0.0002   | 3.782              |
| J03953             | Gstm3           | 0.0095   | 3.770              |
| AI182499           | Pkhd1           | 0.0019   | 3.755              |
| BB416434           | Ets2            | 0.0166   | 3.746              |
| BC024498           | Tm6sf2          | 0        | 3.731              |

| <b>Genbank Acc</b> | <b>GENENAME</b>                           | <b>P</b> | <b>Fold Change</b> |
|--------------------|-------------------------------------------|----------|--------------------|
| AV204216           | Atp6v0d2                                  | 0.0017   | 3.701              |
| AK017272           | Lpl                                       | 0.0008   | 3.698              |
| AF114437           | Pctp                                      | 0.001    | 3.652              |
| NM_013623          | Orm3                                      | 0.0011   | 3.640              |
| NM_010003          | Cyp2c39                                   | 0.0002   | 3.590              |
| BB824003           | Gemin5                                    | 0.0077   | 3.581              |
| BB628935           | Ank3                                      | 0        | 3.564              |
| NM_133662          | Ier3                                      | 0.0002   | 3.510              |
| AV051678           | Hamp2                                     | 0.0004   | 3.499              |
| AV156640           | LOC100046344 ///<br>LOC100047753 /// Nme1 | 0.0002   | 3.476              |
| U94828             | Rgs16                                     | 0.0234   | 3.469              |
| BG962576           | 4632415K11Rik                             | 0.0374   | 3.460              |
| BC019937           | Tmem53                                    | 0        | 3.453              |
| AW549826           | Atg7                                      | 0.0358   | 3.446              |
| BG793493           | Pde4b                                     | 0.0017   | 3.429              |
| NM_007657          | Cd9                                       | 0        | 3.422              |
| BG072448           | 2010109K09Rik                             | 0.0043   | 3.417              |
| AV370040           | D630039A03Rik                             | 0.0003   | 3.390              |
| BB080456           | Spry4                                     | 0        | 3.374              |
| AK018202           | 2310043N10Rik                             | 0.0008   | 3.374              |
| AF477481           | Cdt1                                      | 0.0078   | 3.371              |
| NM_007707          | Socs3                                     | 0.0002   | 3.371              |
| NM_009811          | Casp6                                     | 0.0012   | 3.358              |
| NM_025459          | Fam134b                                   | 0        | 3.348              |
| BC006681           | Polb                                      | 0.0243   | 3.346              |
| BC021657           | Ank3                                      | 0        | 3.343              |
| AK013866           | Nfx1                                      | 0.0075   | 3.336              |
| BB100249           | Rgs16                                     | 0.0178   | 3.334              |
| BB534670           | Cd36                                      | 0.0001   | 3.332              |
| BB324744           | Esrra                                     | 0.0465   | 3.293              |
| BF466702           | 9430008C03Rik                             | 0.0001   | 3.243              |
| BB436247           | Herpud2                                   | 0        | 3.234              |
| BG072824           | Arrdc3                                    | 0.0046   | 3.218              |
| NM_010001          | Cyp2c37                                   | 0.0045   | 3.213              |
| BG066466           | Iffo2                                     | 0.006    | 3.208              |
| AK013239           | Id2                                       | 0.0109   | 3.198              |
| NM_130881          | Pabpc4                                    | 0.0001   | 3.187              |
| AB056443           | D630002G06Rik                             | 0.006    | 3.186              |
| AK008229           | Anks4b                                    | 0.0001   | 3.161              |
| AV174616           | Tob2                                      | 0.0004   | 3.144              |
| BB283894           | Prkar1b                                   | 0.021    | 3.139              |
| NM_008062          | G6pdx                                     | 0.0139   | 3.120              |

| <b>Genbank Acc</b> | <b>GENENAME</b> | <b>P</b> | <b>Fold Change</b> |
|--------------------|-----------------|----------|--------------------|
| NM_010516          | Cyr61           | 0.0011   | 3.113              |
| BC003903           | Gstt3           | 0.0002   | 3.091              |
| BB479296           |                 | 0.0003   | 3.087              |
| BC018263           | BC089597        | 0.0005   | 3.079              |
| AK017670           | Cpm             | 0.0134   | 3.073              |
| BC010245           | Kank2           | 0.0006   | 3.065              |
| AK018681           | Ankrd39         | 0.003    | 3.045              |
| AV261345           | Prdm11          | 0.0004   | 3.044              |
| NM_008932          | Prlr            | 0        | 3.025              |
| BC027319           | Atp1b1          | 0        | 3.024              |
| BC004781           | Rnf43           | 0.0018   | 3.021              |
| BC013480           | Cbs             | 0.0001   | 3.015              |
| BG921646           | Acaca           | 0.0151   | 3.011              |
| AK018697           | Ldlr            | 0.005    | 3.008              |
| NM_015797          | Fbxo6           | 0.0001   | 3.004              |
| BI083627           | Bat2d           | 0.0168   | 3.003              |
| BB355213           | Prkca           | 0.0024   | 3.001              |
| BB308961           | Klhdc7a         | 0.0044   | 3.000              |
| BB770857           | Ddah1           | 0        | 2.988              |
| BG065719           |                 | 0.0008   | 2.957              |
| M30697             | Abcb1a          | 0.0002   | 2.953              |
| BC022793           | Gnat1           | 0        | 2.948              |
| M58045             | Cnp             | 0.0008   | 2.930              |
| BB447409           | Gm505           | 0        | 2.924              |
| BC023181           | Plekhg5         | 0.0225   | 2.923              |
| AV100225           | Cnpy2           | 0.003    | 2.913              |
| BG075860           |                 | 0.0064   | 2.897              |
| BB124537           | Mtpn            | 0        | 2.889              |
| BF148622           | Sec61a1         | 0        | 2.883              |
| BB441361           | Gspt2           | 0.0002   | 2.871              |
| BG075041           | Amn1            | 0.0001   | 2.870              |
| BC021657           | Ank3            | 0.0004   | 2.867              |
| NM_011857          | Odz3            | 0.0001   | 2.858              |
| BG066220           | Nub1            | 0.0175   | 2.843              |
| BI660702           | Ell3            | 0.0022   | 2.827              |
| AF477481           | Cdt1            | 0.0053   | 2.817              |
| BM119522           | Plxnb1          | 0        | 2.816              |
| AF224264           | Fus             | 0.0002   | 2.816              |
| BB498027           |                 | 0.0019   | 2.798              |
| BB543181           |                 | 0.0094   | 2.793              |
| AV239114           | Ldlr            | 0.0013   | 2.792              |
| NM_021716          | Fign            | 0.0032   | 2.791              |
| AK017247           | Idh2            | 0.0041   | 2.781              |

| Genbank Acc | GENENAME                            | P      | Fold Change |
|-------------|-------------------------------------|--------|-------------|
| AI385586    | Ang                                 | 0.0088 | 2.773       |
| AW556888    | Ddah1                               | 0.0001 | 2.762       |
| AF461145    | Fmo4                                | 0.0002 | 2.747       |
| BB547854    | Tox                                 | 0.048  | 2.742       |
| NM_008380   | Inhba                               | 0.0115 | 2.742       |
| AI549877    |                                     | 0.0003 | 2.737       |
| NM_018737   | Ctps2                               | 0      | 2.736       |
| AV327520    | 5031439G07Rik                       | 0.0032 | 2.731       |
| BC011158    | Serpina3m                           | 0.0002 | 2.729       |
| BE283964    | Ddah1                               | 0.0004 | 2.714       |
| BC006932    | Abca3                               | 0.0001 | 2.711       |
| AV309418    | Ndrp1                               | 0.0049 | 2.708       |
| BB508622    | Trib3                               | 0.0012 | 2.694       |
| BB707122    | Tiparp                              | 0.0039 | 2.691       |
| BI734306    | Syne1                               | 0      | 2.681       |
| AK012141    | 2410002O22Rik ///<br>LOC100044479   | 0.0002 | 2.673       |
| BB758432    | Dixdc1                              | 0.0005 | 2.671       |
| AB013898    | Tnfrsf11b                           | 0.0011 | 2.659       |
| BE372352    | Actr3                               | 0.0006 | 2.656       |
| NM_019545   | Hao3                                | 0.0082 | 2.655       |
| NM_025569   | Mgst3                               | 0.0001 | 2.652       |
| AA792094    | Got1                                | 0.0037 | 2.646       |
| J03953      | Gstm3                               | 0.018  | 2.644       |
| AI303435    | Slc1a4                              | 0.0208 | 2.638       |
| AV336908    | Dlat                                | 0.0001 | 2.637       |
| NM_009876   | Cdkn1c                              | 0.0018 | 2.636       |
| AF126834    | Ppl                                 | 0.0002 | 2.634       |
| AK009101    | Commd10                             | 0.0033 | 2.633       |
| NM_021272   | Fabp7                               | 0.0009 | 2.628       |
| AV238183    | Arhgef10l                           | 0.0081 | 2.622       |
| BF163381    | Snhg1                               | 0.0015 | 2.616       |
| BB769890    | Atp6v0d2                            | 0.0088 | 2.605       |
| BB534670    | Cd36                                | 0.0018 | 2.603       |
| AA215276    | Inca1                               | 0      | 2.602       |
| BC005737    | Nmnat3                              | 0.0003 | 2.598       |
| AK004932    | Gpt                                 | 0.002  | 2.598       |
| NM_017388   | Ear1 /// Ear12 /// Ear2<br>/// Ear3 | 0.0001 | 2.598       |
| NM_007809   | Cyp17a1                             | 0.005  | 2.593       |
| AK009847    | Prss23                              | 0.0034 | 2.589       |
| BE283964    | Ddah1                               | 0      | 2.588       |
| AK018636    | Mkl1                                | 0.0001 | 2.586       |

| Genbank Acc | GENENAME               | P      | Fold Change |
|-------------|------------------------|--------|-------------|
| BB010597    | Trdmt1                 | 0.0018 | 2.585       |
| BC014793    | Pgd                    | 0.0023 | 2.584       |
| AW552536    | Snhg1                  | 0.0008 | 2.583       |
| BB291885    | Abcc4                  | 0.02   | 2.583       |
| BG063333    | Vldlr                  | 0.0479 | 2.582       |
| AI647939    | Slc16a5                | 0.016  | 2.582       |
| AW553065    | Per3                   | 0.0094 | 2.577       |
| BB162021    | Gspt1                  | 0.0066 | 2.572       |
| BB453609    | Wdr6                   | 0.0002 | 2.569       |
| BB745929    | Fam13a                 | 0.0054 | 2.569       |
| NM_009075   | Rpia                   | 0.009  | 2.569       |
| AI846716    | Cox5b                  | 0.0039 | 2.565       |
| BB752393    |                        | 0.0003 | 2.555       |
| BB752393    |                        | 0.0002 | 2.553       |
| BB481178    |                        | 0.0066 | 2.553       |
| BB532898    | D330040H18Rik          | 0.0105 | 2.552       |
| BB705380    | Hmgcs1                 | 0.0136 | 2.540       |
| BC020001    | Aldh1b1                | 0      | 2.537       |
| AV273591    | Nt5e                   | 0.0002 | 2.536       |
| AK004665    | Dhx35                  | 0.0001 | 2.535       |
| NM_019494   | Cxcl11                 | 0.0016 | 2.528       |
| BM120569    | Ppargc1a               | 0      | 2.519       |
| AF321301    | Fgfr1 /// LOC100046239 | 0.0018 | 2.517       |
| BF020504    | Setd4                  | 0.0205 | 2.514       |
| BQ033064    | N6amt1                 | 0      | 2.513       |
| AV337650    | Lrrc24                 | 0.0001 | 2.510       |
| BG064092    | Wipf3                  | 0.0192 | 2.510       |
| BB590675    | Pspc1                  | 0      | 2.508       |
| BC026366    | Cep152                 | 0.0052 | 2.506       |
| AK014950    | Gnpda2                 | 0      | 2.502       |
| BB534423    | Ldlrad3                | 0.0053 | 2.493       |
| M30697      | Abcb1a                 | 0.0027 | 2.491       |
| BC025858    | 2210021J22Rik          | 0.003  | 2.488       |
| NM_013798   | Actg1                  | 0.0037 | 2.485       |
| BB705380    | Hmgcs1                 | 0.0137 | 2.483       |
| AI428839    | Cbx8                   | 0.0023 | 2.481       |
| AB030503    | Rdh11                  | 0.0176 | 2.480       |
| BB238321    | 5830467E07Rik /// Amn1 | 0.0002 | 2.480       |
| BB558114    | Pgd                    | 0.0184 | 2.480       |
| NM_009870   | Cdk4 /// LOC640611     | 0      | 2.477       |
| AF224264    | Fus                    | 0.0003 | 2.475       |
| BB667837    | Rrbp1                  | 0.0001 | 2.475       |
| BE983392    | AI428301               | 0.0002 | 2.475       |



| <b>Genbank Acc</b> | <b>GENENAME</b> | <b>P</b> | <b>Fold Change</b> |
|--------------------|-----------------|----------|--------------------|
| AK011343           | 2610008E11Rik   | 0.0011   | 2.472              |
| AV286265           | Xdh             | 0        | 2.471              |
| BB324466           | Dnaja2          | 0.0047   | 2.465              |
| AK014742           | Lss             | 0.0015   | 2.460              |
| NM_030687          | Slco1a4         | 0.0055   | 2.454              |
| NM_008608          | Mmp14           | 0.0007   | 2.450              |
| AI987929           | Ndrp1           | 0.0145   | 2.447              |
| BB458543           | Fam101a         | 0.0062   | 2.442              |
| BC017528           | Arrdc4          | 0.0173   | 2.439              |
| NM_031392          | Wdr6            | 0.0002   | 2.438              |
| AF328140           | Cables1         | 0        | 2.436              |
| BM206427           | Rprd2           | 0.0007   | 2.435              |
| BE303700           | D330050I23Rik   | 0.0042   | 2.432              |
| BG071931           | Camk1d          | 0.0004   | 2.432              |
| NM_020296          | Rbms1           | 0        | 2.427              |
| NM_026189          | Eepd1           | 0.0014   | 2.427              |
| BG067625           | Ildr2           | 0.0405   | 2.417              |
| BM218328           | D10627          | 0.0002   | 2.417              |
| BC019946           | Atf3            | 0.0287   | 2.414              |
| L07645             | Hal             | 0.0002   | 2.410              |
| BQ031259           | Iffo2           | 0.012    | 2.409              |
| NM_011797          | Car14           | 0.0038   | 2.408              |
| U58862             | Lepr            | 0.0008   | 2.406              |
| BB053697           | Adk             | 0.0005   | 2.405              |
| AV306676           | Mrpl15          | 0.0102   | 2.397              |
| AV239969           | Itih5           | 0.0007   | 2.395              |
| X16834             | Lgals3          | 0.0013   | 2.393              |
| AF220141           | Trim34          | 0.025    | 2.391              |
| BB797326           | Amdhd1          | 0.0005   | 2.385              |
| BG063981           | Ddx58           | 0        | 2.381              |
| AU019438           | Commd10         | 0.0015   | 2.376              |
| BE334274           |                 | 0.0037   | 2.372              |
| BB705380           | Hmgcs1          | 0.0104   | 2.372              |
| BI076710           | 9630010G10Rik   | 0.0282   | 2.371              |
| BB739342           | Sall1           | 0.0041   | 2.369              |
| BB490651           |                 | 0.0008   | 2.366              |
| NM_031367          | H28             | 0.0006   | 2.366              |
| NM_008681          | Ndrp1           | 0.0028   | 2.364              |
| NM_011414          | Slpi            | 0.0002   | 2.361              |
| NM_023876          | Elp4            | 0        | 2.360              |
| AB030503           | Rdh11           | 0.0075   | 2.358              |
| NM_013929          | Siva1           | 0.0125   | 2.357              |
| BG244780           |                 | 0.0005   | 2.353              |

| Genbank Acc | GENENAME                                 | P      | Fold Change |
|-------------|------------------------------------------|--------|-------------|
| AK013138    | Gcat                                     | 0.0039 | 2.352       |
| BC024953    | 5033414D02Rik                            | 0      | 2.347       |
| AB037596    | Gcnt2                                    | 0.0004 | 2.347       |
| BM239196    | Gcnt2                                    | 0.0002 | 2.345       |
| NM_133707   | 1810019J16Rik                            | 0      | 2.340       |
| BM239677    | Heatr1                                   | 0.0048 | 2.340       |
| AW763751    | 629242 /// BC005512 ///<br>F630007L15Rik | 0.0009 | 2.338       |
| BC010332    | Ppap2c                                   | 0.0003 | 2.335       |
| AK020571    |                                          | 0.0072 | 2.332       |
| BF225802    | Igfbp5                                   | 0.0023 | 2.331       |
| BF319989    | Plscr1                                   | 0.0002 | 2.331       |
| BB326329    | Nipa1                                    | 0.0013 | 2.329       |
| AK017778    | Ankrd24                                  | 0.0007 | 2.328       |
| BC011282    | Mad2l2                                   | 0.0012 | 2.326       |
| BC026595    | Cbs                                      | 0.0002 | 2.322       |
| AB066227    | Hlcs                                     | 0.0001 | 2.320       |
| BB314208    | Pgd                                      | 0.0223 | 2.317       |
| BC019494    | Fam134b                                  | 0.0002 | 2.314       |
| BB128085    | Als2                                     | 0.0281 | 2.311       |
| NM_019736   | Acot9                                    | 0      | 2.311       |
| AK012088    | Acsl3                                    | 0.0107 | 2.301       |
| AI317339    | Itih5                                    | 0.0002 | 2.299       |
| AI504711    |                                          | 0.0004 | 2.297       |
| BG244780    | EG631624                                 | 0.001  | 2.297       |
| BM214836    | 2810403A07Rik                            | 0.0004 | 2.293       |
| BB188040    | Hps1                                     | 0.028  | 2.291       |
| AK009957    | Hddc2                                    | 0.0025 | 2.291       |
| BB705380    | Hmgcs1                                   | 0.0119 | 2.290       |
| BI248354    | Rell1                                    | 0.0001 | 2.290       |
| BB707122    | Tiparp                                   | 0.0124 | 2.289       |
| BM218086    |                                          | 0      | 2.288       |
| BC019216    | Pqlc2                                    | 0.0001 | 2.287       |
| AK013095    | Rfc3                                     | 0.0053 | 2.285       |
| BB456021    | D130043K22Rik                            | 0.004  | 2.281       |
| AK016825    | Rnf41                                    | 0.0285 | 2.281       |
| BC011172    | Hnrnpd                                   | 0.0014 | 2.281       |
| BC019521    | Zfyve21                                  | 0      | 2.280       |
| BC009123    | 2810051F02Rik                            | 0.0092 | 2.277       |
| AY037804    | Setd4                                    | 0.0219 | 2.275       |
| BB523936    |                                          | 0.037  | 2.273       |
| BI663145    | Phf15                                    | 0.0002 | 2.271       |
| BC002276    | Fbxw9                                    | 0.0153 | 2.268       |

| <b>Genbank Acc</b> | <b>GENENAME</b>            | <b>P</b> | <b>Fold Change</b> |
|--------------------|----------------------------|----------|--------------------|
| BI730930           | Akap7                      | 0.002    | 2.268              |
| BB663640           | BC029214                   | 0.004    | 2.267              |
| NM_011084          | Pik3c2g                    | 0.0013   | 2.267              |
| BB707122           | Tiparp                     | 0.0073   | 2.266              |
| AI463873           | Nr2f2                      | 0.0083   | 2.266              |
| AW550676           |                            | 0.0294   | 2.265              |
| NM_016706          | Coil                       | 0.0011   | 2.265              |
| AF153199           | Mmp19                      | 0.0072   | 2.264              |
| AK014950           | Gnpda2                     | 0        | 2.262              |
| BG070516           | Atpbd4                     | 0        | 2.260              |
| NM_016902          | Nphp1                      | 0.026    | 2.259              |
| AI606154           | 5730409N24Rik              | 0.0054   | 2.259              |
| BC026964           | Zbtb22                     | 0        | 2.258              |
| NM_024191          | Arl2bp                     | 0.0005   | 2.256              |
| AV021593           | Mrpl52                     | 0.0083   | 2.255              |
| BB531820           | Thrap3                     | 0        | 2.254              |
| BB135800           | Scly                       | 0.0001   | 2.254              |
| NM_007865          | Dll1                       | 0.0024   | 2.251              |
| BC024943           | 2010107G23Rik              | 0.0127   | 2.250              |
| BB667838           | 1810008I18Rik              | 0.032    | 2.249              |
| AI323642           | Tcf7                       | 0.0365   | 2.247              |
| BC010712           | Eid1                       | 0        | 2.246              |
| NM_025703          | LOC100045031 ///<br>Tceal8 | 0        | 2.246              |
| AI604411           |                            | 0.0017   | 2.244              |
| NM_020589          | Zfp467                     | 0.0002   | 2.243              |
| AI551199           | Agtr1a                     | 0        | 2.243              |
| AK007796           | 1810046K07Rik              | 0.0001   | 2.241              |
| BB127325           | Rcor3                      | 0.0176   | 2.240              |
| AK011480           | Zfp157                     | 0.0055   | 2.237              |
| BG071931           | Camk1d                     | 0.0002   | 2.234              |
| AI503931           |                            | 0.0001   | 2.234              |
| BB322051           | 2010012O05Rik              | 0.0009   | 2.233              |
| AK017845           | Ostc                       | 0        | 2.229              |
| BB540543           | Slc30a10                   | 0.0383   | 2.227              |
| AV352204           |                            | 0.0026   | 2.227              |
| AB026551           | Nfkbiz                     | 0.0096   | 2.227              |
| BM214338           | 1700019G17Rik              | 0.0198   | 2.227              |
| AV303002           | Nupl1                      | 0.0013   | 2.226              |
| BB359043           | Mterfd3                    | 0.0009   | 2.226              |
| BG076151           | LOC100045551 ///<br>Ppm1d  | 0.0049   | 2.226              |
| BB235116           | Ttc7                       | 0.0002   | 2.225              |

| Genbank Acc | GENENAME                           | P      | Fold Change |
|-------------|------------------------------------|--------|-------------|
| NM_008149   | Gpam                               | 0.0223 | 2.225       |
| BC014687    | 1500010J02Rik                      | 0.0008 | 2.224       |
| BM202530    | Zfp826                             | 0.0001 | 2.220       |
| AI790284    | Shpk                               | 0.0026 | 2.220       |
| AV318494    | Mcl1                               | 0.0002 | 2.218       |
| BC027408    | Gypc                               | 0.0004 | 2.217       |
| NM_016658   | Galt                               | 0.0001 | 2.216       |
| AK011450    | 1200014J11Rik                      | 0      | 2.212       |
| BC004768    | 6430706D22Rik                      | 0.0001 | 2.212       |
| W34605      | ORF19                              | 0.0001 | 2.212       |
| AV047635    | OTTMUSG00000010657                 | 0.0098 | 2.208       |
| AV339946    | Gcc1                               | 0.0022 | 2.208       |
| NM_010499   | ler2                               | 0      | 2.204       |
| AK015145    | Dimt1                              | 0.0015 | 2.202       |
| BM933750    |                                    | 0.0004 | 2.200       |
| NM_030880   | Pacsin3                            | 0.0018 | 2.200       |
| U95030      | Alcam                              | 0.0001 | 2.200       |
| BM123721    | Rbmx                               | 0      | 2.199       |
| BB553796    | Agxt2l2                            | 0.0294 | 2.198       |
| AK018271    | Dpf2                               | 0.0001 | 2.196       |
| BB046347    | Mycbp                              | 0.0001 | 2.194       |
| BI666155    | Gnl2 /// LOC633966                 | 0.0001 | 2.194       |
| NM_138952   | Ripk2                              | 0.0028 | 2.192       |
| NM_133248   | Glmn                               | 0.0034 | 2.192       |
| BB820613    | Pion                               | 0.0002 | 2.189       |
| BM234464    |                                    | 0.0004 | 2.189       |
| C79248      | Rbm39                              | 0.001  | 2.188       |
| BB281667    | Zfp719                             | 0.0007 | 2.187       |
| AB056443    | C730048C13Rik ///<br>D630002G06Rik | 0.0084 | 2.186       |
| BE628275    | Zfp467                             | 0.0002 | 2.186       |
| NM_008961   | Pter                               | 0.0035 | 2.184       |
| AV337619    | Ppargc1a                           | 0.0059 | 2.182       |
| BC005555    | Prlr                               | 0.0036 | 2.181       |
| AU021842    | Cdkn2aipnl                         | 0      | 2.180       |
| BB870298    | Rnf166                             | 0      | 2.180       |
| AV003223    | Edf1 ///<br>OTTMUSG00000005089     | 0.0306 | 2.180       |
| NM_018760   | Slc4a4                             | 0      | 2.178       |
| AF047725    | Cyp2c38                            | 0.0022 | 2.177       |
| BB559624    | Nup133                             | 0.0044 | 2.176       |
| BC012655    | Thrap3                             | 0      | 2.176       |
| AI503808    |                                    | 0.0026 | 2.175       |

| <b>Genbank Acc</b> | <b>GENENAME</b>  | <b>P</b> | <b>Fold Change</b> |
|--------------------|------------------|----------|--------------------|
| AV173869           | Erc2             | 0.01     | 2.174              |
| BB540910           | E130110O22Rik    | 0.0001   | 2.174              |
| NM_022816          | Acot10 /// Acot9 | 0        | 2.174              |
| AK013116           | Gins1            | 0.0035   | 2.174              |
| BG078867           | Ggnbp2           | 0.0042   | 2.172              |
| BB297047           | Chrac1           | 0.0003   | 2.171              |
| NM_023580          | Epha1            | 0.0002   | 2.170              |
| AK017049           | 4933433P14Rik    | 0.0092   | 2.168              |
| BI466419           | Mtss1            | 0        | 2.168              |
| AV235415           |                  | 0.0018   | 2.166              |
| AB008453           | Slc2a4           | 0.0158   | 2.166              |
| BB038765           | Kank2            | 0.0005   | 2.164              |
| AA204410           | 2410022M11Rik    | 0.0175   | 2.164              |
| BF318131           |                  | 0.0003   | 2.163              |
| AV218922           | 2610002J02Rik    | 0        | 2.162              |
| BM241351           | Tnfaip3          | 0.0314   | 2.161              |
| AV101245           | Hnrpd1           | 0.0029   | 2.161              |
| BE911144           | Eif2ak2          | 0.0029   | 2.159              |
| NM_008046          | Fst              | 0.0098   | 2.158              |
| BB667699           | Rcor3            | 0.0026   | 2.157              |
| BF536757           | Tbc1d24          | 0.0053   | 2.152              |
| AW493298           | Trim68           | 0.0176   | 2.151              |
| BG068077           | AU021884         | 0.0451   | 2.151              |
| BC026813           | 6330416L07Rik    | 0.0025   | 2.150              |
| NM_008027          | Flot1            | 0.0002   | 2.148              |
| BF017016           | LOC676974        | 0.0108   | 2.148              |
| BB756794           | Prkag2           | 0.0002   | 2.148              |
| BB307742           | Ttc15            | 0.0298   | 2.147              |
| AF366401           | Sertad1          | 0.001    | 2.146              |
| BB535494           | Nedd9            | 0.017    | 2.146              |
| J04620             | Prim1            | 0.0095   | 2.146              |
| BB794868           | Agps             | 0.0062   | 2.145              |
| BE985138           | Fus              | 0        | 2.143              |
| AK021220           | Haghl            | 0.0197   | 2.143              |
| BC016099           | 2410002F23Rik    | 0.0035   | 2.142              |
| BF303544           | Vapb             | 0.0019   | 2.142              |
| AK011776           | 2610044O15Rik    | 0.0026   | 2.142              |
| AK005066           | Amdhd1           | 0.0002   | 2.140              |
| NM_031180          | Klb              | 0.0017   | 2.140              |
| NM_009025          | Rasa3            | 0.0016   | 2.138              |
| BC020138           | Tbc1d19          | 0.0016   | 2.137              |
| BM225143           |                  | 0.0085   | 2.137              |
| AV295650           | S100a10          | 0.002    | 2.137              |

| <b>Genbank Acc</b> | <b>GENENAME</b>  | <b>P</b> | <b>Fold Change</b> |
|--------------------|------------------|----------|--------------------|
| BC011290           | Tceal1           | 0.0019   | 2.136              |
| U05264             | Gp49a /// Lilrb4 | 0.0077   | 2.135              |
| BC026410           | Pls1             | 0.0024   | 2.135              |
| BB131927           | Ankrd56          | 0.0001   | 2.135              |
| AW554594           | Prlr             | 0.0121   | 2.134              |
| NM_031884          | Abcg5            | 0.0015   | 2.133              |
| A1324972           | Sp4              | 0.0025   | 2.132              |
| BB482650           | Fam13a           | 0.003    | 2.130              |
| BC010712           | Eid1             | 0        | 2.126              |
| BG063760           | D5Ertd163e       | 0.009    | 2.126              |
| BB829482           | Ddx59            | 0        | 2.125              |
| BC015287           | Rabep2           | 0.0025   | 2.125              |
| AK019824           | 4930581F22Rik    | 0.0042   | 2.123              |
| BC025568           | Tspan14          | 0.0001   | 2.121              |
| BE686864           | Rmi1             | 0.0327   | 2.121              |
| BB429201           | Prlr             | 0.037    | 2.120              |
| AW553537           |                  | 0.0084   | 2.119              |
| NM_010708          | Lgals9           | 0.0001   | 2.119              |
| BC013542           | Pdzk1ip1         | 0.0246   | 2.118              |
| BM234360           | Fn1              | 0.0067   | 2.118              |
| NM_023057          | B230120H23Rik    | 0.0005   | 2.117              |
| BC007147           | Rab4b            | 0.0032   | 2.117              |
| NM_010066          | Dnmt1            | 0.001    | 2.116              |
| BB667628           | Slc16a10         | 0.0009   | 2.114              |
| BE631036           | Trpt1            | 0.0099   | 2.113              |
| BE457721           |                  | 0.0022   | 2.113              |
| NM_011014          | Sigmar1          | 0.0166   | 2.111              |
| AK012581           | Limd2            | 0.0002   | 2.110              |
| AV222909           | 6030446N20Rik    | 0.0001   | 2.109              |
| BG075800           | St6gal1          | 0.0001   | 2.109              |
| AW321863           |                  | 0.0132   | 2.103              |
| BG976607           |                  | 0.0382   | 2.102              |
| BC007160           | Tmem168          | 0.0013   | 2.102              |
| NM_008489          | Lbp              | 0.0373   | 2.098              |
| BM246564           | Pde4b            | 0.0028   | 2.097              |
| BG069516           | Slc6a8           | 0.0163   | 2.097              |
| NM_016972          | Slc7a8           | 0.0043   | 2.096              |
| BB754259           | E130311K13Rik    | 0.0004   | 2.094              |
| BB251922           | Cnp              | 0.0033   | 2.088              |
| BB133520           | Spred2           | 0.0003   | 2.086              |
| BM233698           | Csf1             | 0.003    | 2.084              |
| AV059397           | Arsg             | 0.0156   | 2.082              |
| NM_010872          | Naip2            | 0.0005   | 2.082              |

| <b>Genbank Acc</b> | <b>GENENAME</b>         | <b>P</b> | <b>Fold Change</b> |
|--------------------|-------------------------|----------|--------------------|
| AV152334           | Atp1b1                  | 0.0001   | 2.081              |
| BB735884           |                         | 0.0026   | 2.080              |
| BB251459           | Rfc4                    | 0.0038   | 2.079              |
| NM_023044          | Slc15a3                 | 0.0031   | 2.079              |
| BB815513           | Tm2d2                   | 0        | 2.078              |
| NM_029385          | Nudt16                  | 0.0044   | 2.078              |
| AV378320           | Ccdc68                  | 0.0012   | 2.078              |
| BC022124           | Mta3                    | 0.013    | 2.075              |
| AF349659           | Txnrd3                  | 0.0051   | 2.075              |
| AW549928           | 6720475J19Rik           | 0.0002   | 2.074              |
| BC010592           | Ethe1                   | 0.0324   | 2.073              |
| NM_010446          | Foxa2                   | 0.0026   | 2.073              |
| NM_008253          | Hmgb3                   | 0.0001   | 2.073              |
| BC012955           | Trib3                   | 0.0002   | 2.073              |
| NM_008316          | Hus1                    | 0.0001   | 2.072              |
| BC027319           | Atp1b1                  | 0.0007   | 2.071              |
| AK005193           | Tatdn3                  | 0.0171   | 2.070              |
| NM_009121          | Sat1                    | 0.0057   | 2.068              |
| AF322238           | Cdca4                   | 0.006    | 2.067              |
| NM_008239          | Foxq1                   | 0.0248   | 2.066              |
| BB177192           | Etnk1                   | 0        | 2.066              |
| AV315205           | Alcam                   | 0        | 2.065              |
| BE630294           | Adora1                  | 0.0026   | 2.065              |
| AI788759           | Ugp2                    | 0.0001   | 2.064              |
| NM_024231          | Zfpl1                   | 0.0494   | 2.062              |
| BF147713           | Ccdc76                  | 0.0003   | 2.059              |
| BB818311           | Tsn                     | 0        | 2.059              |
| AB056479           | Cs                      | 0.005    | 2.058              |
| BF319989           | Plscr1                  | 0.0005   | 2.058              |
| AK009584           | Exosc8                  | 0.0024   | 2.056              |
| BM054266           | Fuca2                   | 0.0013   | 2.055              |
| BC006960           | Snx2                    | 0        | 2.054              |
| BE996326           | Taf1d                   | 0.0014   | 2.054              |
| BG065238           | Phf17                   | 0.0005   | 2.052              |
| NM_011461          | Spic                    | 0.0068   | 2.052              |
| BC024870           | Anapc4                  | 0.0003   | 2.050              |
| NM_008659          | Myo1c                   | 0.0002   | 2.049              |
| NM_025512          | Zfand1                  | 0        | 2.049              |
| BG968708           | Dcp1b                   | 0.0131   | 2.048              |
| BC003227           | Sptlc2                  | 0        | 2.047              |
| AK013866           | Nfx1                    | 0.0001   | 2.042              |
| BB109694           | Fgfrl1 /// LOC100046239 | 0.003    | 2.040              |
| BB355329           |                         | 0.0183   | 2.040              |

| <b>Genbank Acc</b> | <b>GENENAME</b> | <b>P</b> | <b>Fold Change</b> |
|--------------------|-----------------|----------|--------------------|
| BB503266           | Rab1            | 0.0129   | 2.039              |
| AU040151           | Ube2v1          | 0        | 2.039              |
| NM_013808          | Csrp3           | 0.0013   | 2.039              |
| AU015266           | Hnrpdl          | 0.0003   | 2.036              |
| BI903760           | Nsmce1          | 0.0001   | 2.035              |
| BI408205           | Ly6e            | 0.0086   | 2.035              |
| BF582632           | Hexdc           | 0        | 2.034              |
| BE915338           | Iars            | 0.0008   | 2.034              |
| BQ175997           | Scaper          | 0.0045   | 2.033              |
| AV047063           | Aqp11           | 0.0106   | 2.032              |
| BQ031467           | BC052040        | 0.0006   | 2.032              |
| BB820363           | Wdsub1          | 0.0068   | 2.032              |
| AJ244015           | Stau2           | 0.0011   | 2.031              |
| AF439556           | Rwdd3           | 0.0053   | 2.030              |
| BB554191           |                 | 0.0236   | 2.029              |
| BF228243           | Leprot          | 0.0007   | 2.028              |
| AF226605           | Sigmar1         | 0.0165   | 2.025              |
| BB768208           | Sgk3            | 0.0001   | 2.024              |
| NM_020589          | Zfp467          | 0.0318   | 2.023              |
| BC005471           | Zfp810          | 0.0003   | 2.023              |
| NM_023755          | Tcfcp2l1        | 0.0061   | 2.023              |
| AV023018           | 1110028C15Rik   | 0.0001   | 2.023              |
| BG071786           | 9430038I01Rik   | 0.0051   | 2.023              |
| BB095413           | Pgd             | 0.0198   | 2.022              |
| NM_013658          | Sema4a          | 0.0001   | 2.020              |
| AK010066           | 2310066F23Rik   | 0.0121   | 2.017              |
| BI904336           | Dda1            | 0.0001   | 2.016              |
| BG070538           | Cdc2l5          | 0.0057   | 2.014              |
| NM_025464          | Tmem218         | 0.0008   | 2.013              |
| BQ101405           |                 | 0.0038   | 2.013              |
| AI789751           | 9030619P08Rik   | 0.0057   | 2.012              |
| BC025610           | Ttc5            | 0.0002   | 2.010              |
| AF072521           | Parp2           | 0.0003   | 2.010              |
| BG793658           | Aldoa           | 0.0021   | 2.009              |
| AK014134           | Dem1            | 0.005    | 2.007              |
| BC028265           | Zfp759          | 0.0258   | 2.006              |
| AW457682           | Cep57           | 0.0049   | 2.006              |
| AU041266           |                 | 0.0051   | 2.005              |
| NM_009112          | S100a10         | 0.0064   | 2.004              |
| BC021429           | Enoph1          | 0.0367   | 2.002              |
| AW546409           | Cdc23           | 0.0003   | 2.001              |
| NM_138656          | Mvd             | 0.0321   | 2.001              |
| AI552548           | Lrch1           | 0.0084   | 2.001              |



| <b>Genbank Acc</b> | <b>GENENAME</b> | <b>P</b> | <b>Fold Change</b> |
|--------------------|-----------------|----------|--------------------|
| NM_011704          | Vnn1            | 0.0291   | 2.000              |

Supplementary Table S2.b: Lists of genes down-regulated upon FMT-treatment

| Genbank Acc | GENENAME                                    | P      | Fold Change |
|-------------|---------------------------------------------|--------|-------------|
| BC025936    | Cyp4a12a                                    | 0.0058 | -32.573     |
| AI118428    | Ugt2b38                                     | 0      | -30.211     |
| NM_007860   | Dio1                                        | 0      | -27.701     |
| AK011413    | 2610016E04Rik                               | 0.0116 | -22.222     |
| BC016468    | Elovl3                                      | 0.0065 | -20.790     |
| NM_008295   | Hsd3b5                                      | 0.0256 | -19.048     |
| M12573      | Hspa1b                                      | 0.0018 | -17.637     |
| BB205273    | D18ErtD232e                                 | 0.0056 | -17.153     |
| M12573      | Hspa1b                                      | 0.0016 | -17.065     |
| M12573      | Hspa1b                                      | 0.0018 | -16.892     |
| BB743970    | BC015286                                    | 0.0012 | -14.535     |
| BB349758    | Ss18l1                                      | 0.0056 | -14.347     |
| AK009343    | Serpina9                                    | 0.0066 | -14.245     |
| BC024605    | Cml5                                        | 0.0169 | -13.680     |
| X84014      | Lama3                                       | 0.0152 | -13.351     |
| AB031813    | Slco1a1                                     | 0.01   | -10.905     |
| BF460829    | 1110004E09Rik                               | 0.0002 | -10.672     |
| AA267743    | Serpina4-ps1                                | 0.0201 | -9.116      |
| NM_008341   | Igfbp1                                      | 0.0071 | -8.905      |
| AW763765    | Hspa1a                                      | 0.0031 | -8.718      |
| AB031813    | Slco1a1                                     | 0.0123 | -8.651      |
| BF383739    | Serpina4-ps1                                | 0.0054 | -8.183      |
| NM_016704   | C6                                          | 0.0003 | -8.123      |
| U03561      | Hspb1                                       | 0.0006 | -7.949      |
| NM_013560   | Hspb1                                       | 0.0001 | -7.899      |
| NM_007825   | Cyp7b1                                      | 0.0007 | -7.788      |
| BM247465    | E2f8                                        | 0.0052 | -7.593      |
| M27608      | 2610016E04Rik /// Mup1<br>/// Mup2 /// Mup3 | 0.0204 | -7.479      |
| BF383739    | Serpina4-ps1                                | 0.0043 | -7.429      |
| NM_007825   | Cyp7b1                                      | 0.0008 | -7.353      |
| NM_020564   | Sult5a1                                     | 0.0001 | -7.092      |
| AU079047    | Hsp90aa1                                    | 0.0003 | -6.826      |
| BB369191    | D0H4S114                                    | 0.0027 | -6.653      |
| BI499717    | Hsph1                                       | 0.0006 | -6.527      |
| AB054000    | Fitm1                                       | 0.0117 | -6.498      |
| D67017      | Hsph1                                       | 0.001  | -6.329      |
| BE651535    |                                             | 0.0055 | -6.223      |
| NM_013584   | Lifr                                        | 0.0032 | -5.974      |
| M63244      | Alas2                                       | 0.0035 | -5.963      |
| BB378708    | Lpin2                                       | 0.0004 | -5.889      |
| NM_053215   | Ugt2b37                                     | 0.009  | -5.889      |

| Genbank Acc | GENENAME                           | P      | Fold Change |
|-------------|------------------------------------|--------|-------------|
| BF322785    | 2610016E04Rik /// Mup1<br>/// Mup2 | 0.019  | -5.838      |
| Y13832      | Meg3                               | 0.0273 | -5.804      |
| BF682848    | Fam107a                            | 0.0244 | -5.577      |
| AK017880    | Creld2                             | 0.001  | -5.495      |
| AK004179    | Pdgfrl                             | 0.0007 | -5.459      |
| D45203      | D0H4S114                           | 0.0073 | -5.385      |
| AK005692    | Pdilt                              | 0.0104 | -5.362      |
| AY061760    | LOC100046232 /// Nfil3             | 0.0117 | -5.244      |
| AV002340    | 4833442J19Rik                      | 0.0005 | -4.983      |
| AK008824    | Nudt7                              | 0.0439 | -4.936      |
| NM_020581   | Angptl4                            | 0.0006 | -4.824      |
| BB449881    | 9430083A17Rik                      | 0.0461 | -4.688      |
| BG067274    | Onecut1                            | 0.0007 | -4.666      |
| NM_029550   | Keg1                               | 0.0005 | -4.649      |
| M16360      | Mup5                               | 0.016  | -4.589      |
| BB550273    | Prei4                              | 0.0003 | -4.579      |
| BC016096    | Scara5                             | 0.0007 | -4.533      |
| AW556192    | Nfia                               | 0.0104 | -4.386      |
| BG297038    | LOC433762                          | 0.0202 | -4.363      |
| Y13832      | Meg3                               | 0.0268 | -4.361      |
| D17444      | Lifr                               | 0.0009 | -4.294      |
| BB115446    |                                    | 0.0011 | -4.270      |
| AV365503    | 8430408G22Rik                      | 0.0097 | -4.259      |
| AV278384    | Ces7                               | 0.0018 | -4.198      |
| BB032012    | Slc25a30                           | 0.0033 | -4.198      |
| BB044654    | Col27a1                            | 0.0001 | -4.163      |
| BC002070    | Ly6a                               | 0.0084 | -4.124      |
| BC010973    | Cyp8b1                             | 0.0007 | -4.085      |
| AV000840    |                                    | 0.0041 | -3.995      |
| BB545511    | EG666892                           | 0.0205 | -3.945      |
| BB032012    | Slc25a30                           | 0.0173 | -3.940      |
| C77384      | Hsp90aa1                           | 0.0022 | -3.905      |
| C77287      | Hsp90aa1                           | 0.0016 | -3.890      |
| BG070713    | Rab30                              | 0.0004 | -3.865      |
| BG229036    |                                    | 0.0002 | -3.802      |
| BC021842    | Susd4                              | 0.0025 | -3.795      |
| BI413218    | Acsl1                              | 0.0002 | -3.779      |
| NM_008218   | Hba-a1 /// Hba-a2                  | 0.0087 | -3.771      |
| NM_025404   | Arl4d                              | 0      | -3.738      |
| BB042134    | Abcd3                              | 0.0361 | -3.719      |
| BC026598    | Slc22a7                            | 0.0046 | -3.618      |
| NM_023455   | Cml4                               | 0.001  | -3.588      |

| <b>Genbank Acc</b> | <b>GENENAME</b>                     | <b>P</b> | <b>Fold Change</b> |
|--------------------|-------------------------------------|----------|--------------------|
| AK005692           | Pdilt                               | 0        | -3.561             |
| BI144810           | BC024137                            | 0.0012   | -3.547             |
| BB183385           | Irf2bp2                             | 0.0007   | -3.539             |
| NM_007824          | Cyp7a1                              | 0.0386   | -3.514             |
| BI076807           |                                     | 0        | -3.506             |
| AK010648           | Mcm10                               | 0.0002   | -3.459             |
| BE956940           | Lonrf3                              | 0.0007   | -3.451             |
| AK016522           | Lonrf3                              | 0.0057   | -3.434             |
| BB283688           | C730036E19Rik                       | 0.0014   | -3.426             |
| AF277898           | Egfr                                | 0        | -3.368             |
| NM_012006          | Acot1 /// LOC100044830              | 0.0008   | -3.350             |
| NM_011388          | Slc10a2                             | 0.0048   | -3.344             |
| BM240237           | Acox1                               | 0.0046   | -3.299             |
| AK012685           | 2810007J24Rik                       | 0.0107   | -3.298             |
| BC015290           | Ces2 ///<br>ENSMUSG00000031884      | 0.0058   | -3.279             |
| AK018143           | Cgn                                 | 0.0414   | -3.243             |
| NM_054048          | Rcor2                               | 0.0031   | -3.228             |
| BC020021           | Ttc39c                              | 0.0054   | -3.200             |
| AK009156           | 2310004N24Rik                       | 0.0275   | -3.200             |
| NM_134188          | Acot1 /// Acot2 ///<br>LOC100044830 | 0.0005   | -3.197             |
| AV377066           | 9130221J18Rik                       | 0.0004   | -3.194             |
| BB091427           | Adcy5 /// LOC100047385              | 0.0437   | -3.189             |
| BC003792           | Apobec1                             | 0.0002   | -3.180             |
| AK011116           | Hba-a1 /// Hba-a2                   | 0.0125   | -3.171             |
| NM_009255          | Serpine2                            | 0.0001   | -3.139             |
| AV028075           | Ttc39c                              | 0.0146   | -3.139             |
| U95826             | Ccng2                               | 0.0129   | -3.123             |
| BM195499           | Ptbp1                               | 0.0004   | -3.120             |
| AK003441           | Ankhd1 /// Eif4ebp3                 | 0.0147   | -3.118             |
| AV338634           | Ctsa                                | 0.0173   | -3.109             |
| BC027434           | Hbb-b1 /// Hbb-b2                   | 0.0152   | -3.071             |
| AI987711           | Acsm2                               | 0.0001   | -3.059             |
| BE980727           | Clmn                                | 0.0482   | -3.056             |
| BC010799           | Glyat                               | 0        | -3.052             |
| NM_011395          | Slc22a3                             | 0.0349   | -3.052             |
| BM021574           |                                     | 0.0161   | -3.041             |
| BB536254           |                                     | 0.0016   | -3.020             |
| AK008824           | Nudt7                               | 0.0232   | -3.013             |
| BB750043           | 9530006C21Rik                       | 0.0005   | -2.991             |
| AV353028           | Clpx                                | 0.0003   | -2.977             |

| Genbank Acc | GENENAME                                                                                                    | P      | Fold Change |
|-------------|-------------------------------------------------------------------------------------------------------------|--------|-------------|
| NM_013550   | Hist1h4a /// Hist1h4b ///<br>Hist1h4c /// Hist1h4h ///<br>Hist1h4i /// Hist1h4j ///<br>Hist1h4k /// Hist1h4 | 0.0036 | -2.971      |
| BG069864    | Cry1                                                                                                        | 0.0011 | -2.964      |
| AI256288    | E2f8 /// LOC100046261                                                                                       | 0.0003 | -2.958      |
| BB206220    | Pim3                                                                                                        | 0.0229 | -2.953      |
| NM_013485   | C9                                                                                                          | 0.0007 | -2.952      |
| AI314028    | P4ha1                                                                                                       | 0.0003 | -2.952      |
| BB227434    | A630005I04Rik                                                                                               | 0.0051 | -2.950      |
| NM_011020   | Hspa4l                                                                                                      | 0.0004 | -2.940      |
| BB032012    | Slc25a30                                                                                                    | 0.0035 | -2.891      |
| NM_011020   | Hspa4l                                                                                                      | 0.0003 | -2.887      |
| AA162958    | 2200001I15Rik                                                                                               | 0.0006 | -2.881      |
| AI314028    | P4ha1                                                                                                       | 0.0117 | -2.853      |
| BM120737    | Ahsa2                                                                                                       | 0.0006 | -2.828      |
| BB546845    | Trp53inp2                                                                                                   | 0      | -2.804      |
| BB329302    | Wsb2                                                                                                        | 0.0001 | -2.777      |
| BB270852    |                                                                                                             | 0.0023 | -2.772      |
| BI413218    | Acsl1                                                                                                       | 0      | -2.750      |
| BB079486    | LOC100044968                                                                                                | 0.0064 | -2.740      |
| BF466918    | Cys1                                                                                                        | 0.0007 | -2.729      |
| AI461691    | Hspa4l                                                                                                      | 0.0001 | -2.729      |
| AK011116    | Hba-a1 /// Hba-a2                                                                                           | 0.0086 | -2.709      |
| BC011293    | Slc25a33                                                                                                    | 0.0001 | -2.708      |
| BM124262    | Klhl24                                                                                                      | 0.0091 | -2.708      |
| AV154597    | 2900064B18Rik                                                                                               | 0.0146 | -2.681      |
| BF234005    | Serpina3k                                                                                                   | 0.0052 | -2.677      |
| BM729431    | Slc5a3                                                                                                      | 0.0003 | -2.671      |
| NM_011316   | Saa4                                                                                                        | 0.0029 | -2.665      |
| AK011172    | Nudt7                                                                                                       | 0.0267 | -2.660      |
| BB044461    | Ttc39c                                                                                                      | 0.0073 | -2.655      |
| BB433596    |                                                                                                             | 0.0097 | -2.654      |
| BB745805    | Acsm2                                                                                                       | 0.026  | -2.648      |
| AV369812    | Egfr                                                                                                        | 0.0092 | -2.644      |
| AA590970    | Hip1r                                                                                                       | 0.0007 | -2.641      |
| BC027200    | Ugt2b1                                                                                                      | 0.0007 | -2.636      |
| BB771206    |                                                                                                             | 0.0089 | -2.634      |
| AK004874    | Rapgef4                                                                                                     | 0.001  | -2.626      |
| BC019757    | Hist1h4i                                                                                                    | 0.0131 | -2.612      |
| AV174022    |                                                                                                             | 0.0042 | -2.612      |
| BG070556    |                                                                                                             | 0.0012 | -2.609      |
| NM_025844   | Chordc1                                                                                                     | 0      | -2.596      |

| <b>Genbank Acc</b> | <b>GENENAME</b> | <b>P</b> | <b>Fold Change</b> |
|--------------------|-----------------|----------|--------------------|
| AV369935           | Aadacl1         | 0.0006   | -2.585             |
| BF141076           | Dnaja1          | 0.0001   | -2.573             |
| NM_010286          | Tsc22d3         | 0.0008   | -2.563             |
| BI076807           |                 | 0.0375   | -2.558             |
| BE688907           | Hist1h1e        | 0.0002   | -2.552             |
| NM_018881          | Fmo2            | 0.005    | -2.549             |
| AK014853           | 4921509J17Rik   | 0.0022   | -2.547             |
| BG076194           |                 | 0.0326   | -2.540             |
| AA530749           | Srd5a1          | 0.0034   | -2.539             |
| BI411560           | Mgll            | 0.0054   | -2.532             |
| NM_020283          | B3galt1         | 0.0252   | -2.524             |
| BQ176176           | Plcx2           | 0.0005   | -2.518             |
| BM240017           |                 | 0.0094   | -2.516             |
| BC015270           | Hist2h3c2       | 0.0345   | -2.511             |
| NM_133969          | Cyp4v3          | 0.0005   | -2.507             |
| AK002290           | Dnajb1          | 0        | -2.506             |
| AK019597           | Srd5a1          | 0.0011   | -2.506             |
| BC022129           | C8b             | 0.0002   | -2.504             |
| AJ132394           | Rorc            | 0.0057   | -2.490             |
| BB453676           | Hspa8           | 0        | -2.486             |
| BG072404           | Ahcyl2          | 0.0001   | -2.476             |
| NM_010062          | Dnase2a         | 0.003    | -2.476             |
| BG075092           |                 | 0.004    | -2.473             |
| BC023083           | Spsb4           | 0.0096   | -2.469             |
| BC019978           | Slc25a25        | 0.0081   | -2.464             |
| AI503514           | Clip1           | 0.0244   | -2.463             |
| AV003635           | Srd5a1          | 0.0067   | -2.460             |
| D50527             | Ubc             | 0        | -2.441             |
| BI413218           | Acsl1           | 0.0001   | -2.438             |
| BF455403           | Susd4           | 0.0009   | -2.435             |
| AK005570           | Ppp1r3g         | 0.0307   | -2.435             |
| NM_021422          | Dnaja4          | 0.0001   | -2.418             |
| NM_011031          | P4ha2           | 0.0008   | -2.403             |
| NM_009272          | Srm             | 0.0046   | -2.400             |
| BC025552           | Ahsa1           | 0        | -2.398             |
| AW989410           | Nampt           | 0.0095   | -2.394             |
| AY033912           | Csad            | 0.0104   | -2.391             |
| BB283832           |                 | 0.01     | -2.379             |
| BQ176176           | Plcx2           | 0.0018   | -2.366             |
| BM231738           | Hyou1           | 0.0021   | -2.364             |
| BG071905           | Palld           | 0.0001   | -2.362             |
| BB777667           | Ip6k2           | 0.0329   | -2.362             |
| BB272732           | Upp2            | 0.0483   | -2.362             |

| Genbank Acc | GENENAME                   | P      | Fold Change |
|-------------|----------------------------|--------|-------------|
| BQ176119    | Dnaja4                     | 0.0018 | -2.360      |
| AB061276    | Cmah                       | 0.0137 | -2.347      |
| AF071068    | Ddc                        | 0.008  | -2.344      |
| BG073853    | Akr1c19                    | 0      | -2.340      |
| BC018344    | Cyp2d13                    | 0.01   | -2.340      |
| BI737125    | 3021401C12Rik              | 0.0028 | -2.339      |
| BB044654    | Col27a1                    | 0.0002 | -2.330      |
| NM_009525   | Wnt5b                      | 0.0365 | -2.330      |
| BI410130    | Pnrc1                      | 0.0349 | -2.329      |
| AK005014    | 1300015D01Rik              | 0.0008 | -2.328      |
| BB393078    | Nrxn3                      | 0.011  | -2.327      |
| BE852040    |                            | 0.0324 | -2.327      |
| AK020905    | Kif13b                     | 0.0037 | -2.322      |
| AW546318    |                            | 0      | -2.320      |
| BC025940    | Ugt3a1                     | 0.0054 | -2.318      |
| BB035017    | Rarres1                    | 0.0096 | -2.309      |
| U03425      | Egfr                       | 0.0063 | -2.304      |
| NM_133930   | Creld1                     | 0.0001 | -2.303      |
| BB183385    | Irf2bp2                    | 0.0047 | -2.303      |
| NM_015811   | Rgs1                       | 0.0012 | -2.301      |
| AK014346    | Serpina12                  | 0.0315 | -2.298      |
| BB699910    | Arid5b ///<br>LOC100044968 | 0.0098 | -2.295      |
| BI466416    |                            | 0.001  | -2.293      |
| AK014338    | Armet                      | 0.0116 | -2.290      |
| BG069738    |                            | 0.0002 | -2.289      |
| BC006722    | Hspa8                      | 0.0005 | -2.282      |
| AW123841    | C730043O17                 | 0.0151 | -2.281      |
| AK007348    | Derl3                      | 0.0376 | -2.281      |
| AF128849    | Cyp2b10                    | 0.0088 | -2.278      |
| BB353860    | Frat2                      | 0.0125 | -2.275      |
| NM_025341   | Abhd6                      | 0.0005 | -2.270      |
| AK017206    | 5033430I15Rik              | 0.002  | -2.261      |
| BE987427    | Lpgat1                     | 0.0024 | -2.260      |
| U03425      | Egfr                       | 0.0111 | -2.260      |
| AK006949    | Mgll                       | 0.0035 | -2.259      |
| BM247599    |                            | 0.0002 | -2.253      |
| NM_134069   | Slc17a3                    | 0.0092 | -2.250      |
| AI265463    | Pck1                       | 0.0064 | -2.249      |
| NM_022324   | Sdf2l1                     | 0.0034 | -2.247      |
| NM_011920   | Abcg2                      | 0.0012 | -2.243      |
| AV062896    | Ociad2                     | 0.015  | -2.236      |
| NM_019414   | Selenbp1                   | 0.0002 | -2.231      |

| Genbank Acc | GENENAME              | P      | Fold Change |
|-------------|-----------------------|--------|-------------|
| NM_011396   | Slc22a5               | 0.0009 | -2.228      |
| BB712151    | Lman2l                | 0.0003 | -2.222      |
| AI848345    |                       | 0.0097 | -2.208      |
| NM_018881   | Fmo2                  | 0.0131 | -2.206      |
| BB142015    | Marveld1              | 0.0092 | -2.204      |
| AK013216    | Ercc8                 | 0.0019 | -2.201      |
| BB414617    | Dnaja1                | 0.0006 | -2.198      |
| AF205078    | Palld                 | 0.0007 | -2.197      |
| BB428304    |                       | 0.0008 | -2.195      |
| BG069505    | Slc12a2               | 0.0019 | -2.195      |
| BC027748    | C8a                   | 0.0013 | -2.193      |
| NM_013743   | Pdk4                  | 0.0039 | -2.193      |
| C85322      | Syvn1                 | 0.0001 | -2.185      |
| BM245957    | Cmah                  | 0.0274 | -2.180      |
| AI426506    | C630028N24Rik         | 0.0079 | -2.176      |
| BB466021    | Cep110                | 0.011  | -2.165      |
| AK004902    | Hmgcs2                | 0.0025 | -2.162      |
| BB018051    | AW987390              | 0.0001 | -2.160      |
| NM_016737   | Stip1                 | 0.0022 | -2.160      |
| AJ311773    | Art3                  | 0.0016 | -2.151      |
| BB141577    | Fmo5 /// LOC100046051 | 0.0001 | -2.145      |
| AI835088    | Herpud1               | 0.0002 | -2.145      |
| AK021389    | Lpin2                 | 0.0175 | -2.145      |
| NM_009722   | Atp2a2                | 0      | -2.144      |
| BI154147    | Hsp90ab1              | 0      | -2.143      |
| BB489416    | Unc84b                | 0.0002 | -2.143      |
| NM_007717   | Cmah                  | 0.0311 | -2.142      |
| AW551908    | Ubc                   | 0      | -2.140      |
| BB521491    | Fitm2                 | 0      | -2.138      |
| AA245637    | Atp2a2                | 0.0003 | -2.135      |
| BB825733    | Trim7                 | 0.0418 | -2.134      |
| NM_011844   | Mgll                  | 0.0066 | -2.124      |
| BB464192    | Mapre1                | 0.0268 | -2.123      |
| NM_133969   | Cyp4v3                | 0.0062 | -2.120      |
| BI653033    | Ubc                   | 0      | -2.116      |
| AA245637    | Atp2a2                | 0.0026 | -2.116      |
| NM_022331   | Herpud1               | 0.0003 | -2.114      |
| AK002603    | 0610012H03Rik         | 0.0001 | -2.112      |
| AA244468    | Tmcc1                 | 0.0012 | -2.110      |
| BC017621    | Pim3                  | 0.0471 | -2.107      |
| AV094609    | Mtmr7                 | 0.0125 | -2.106      |
| BC006680    | LOC100048105 /// Ubc  | 0      | -2.102      |
| BF141076    | Dnaja1                | 0.001  | -2.095      |



| Genbank Acc | GENENAME           | P      | Fold Change |
|-------------|--------------------|--------|-------------|
| BC021632    | Lgals4             | 0.0009 | -2.084      |
| BB093563    | Meg3               | 0.0015 | -2.084      |
| AK009137    | Prei4              | 0.002  | -2.083      |
| BB703486    | Snrnp48            | 0.0004 | -2.082      |
| BE691662    | Hist2h3c1          | 0.0011 | -2.079      |
| AF091432    | Ccne2              | 0.0053 | -2.076      |
| NM_011068   | Pex11a             | 0      | -2.075      |
| BM947855    | Plk3               | 0.0261 | -2.075      |
| BC026435    | 9130208E07Rik      | 0.001  | -2.070      |
| AA216953    | ENSMUSG00000074917 | 0.0029 | -2.068      |
| AV332097    | Tmem125            | 0.0432 | -2.067      |
| BM250711    | Ibtk               | 0.0005 | -2.066      |
| AJ132394    | Rorc               | 0.0191 | -2.066      |
| BB775176    | Retsat             | 0.0116 | -2.065      |
| NM_008362   | Il1r1              | 0.0377 | -2.065      |
| AA985897    | Al195470           | 0.0001 | -2.061      |
| NM_010284   | Ghr                | 0.0005 | -2.060      |
| BE136147    | Gigyf2             | 0.0017 | -2.058      |
| BG068782    | Rnf20              | 0.0094 | -2.042      |
| AF282251    | Caln1              | 0.0006 | -2.041      |
| AV108872    | Ccdc117            | 0.0001 | -2.039      |
| AK021389    | Lpin2              | 0.0331 | -2.037      |
| BB186319    | Slc25a25           | 0.0232 | -2.035      |
| BC006722    | Hspa8              | 0.0008 | -2.034      |
| BC020080    | Tmem140            | 0.0104 | -2.034      |
| AB012278    | Cebpb              | 0.0472 | -2.034      |
| NM_007546   | Bik                | 0.0015 | -2.033      |
| BM230202    | Smarca2            | 0.0006 | -2.031      |
| U95826      | Ccng2              | 0.0006 | -2.031      |
| NM_025341   | Abhd6              | 0.0024 | -2.028      |
| BG063905    | Pdxk               | 0.0023 | -2.028      |
| AV221889    | Tmcc1              | 0      | -2.027      |
| BM238838    |                    | 0.0118 | -2.027      |
| AV288616    | 4833442J19Rik      | 0.0069 | -2.026      |
| AV018723    | H2-Aa              | 0.0107 | -2.024      |
| BC019147    | EG13909 /// Es31   | 0.0102 | -2.022      |
| BB132493    | Rsad2              | 0.0103 | -2.019      |
| BC026823    | Pdcd6ip            | 0      | -2.015      |
| BB782031    | Gigyf2             | 0.0065 | -2.012      |
| BB308952    | Zbtb20             | 0.0006 | -2.011      |
| BQ177185    | Wdr37              | 0.006  | -2.006      |
| BG063905    | Pdxk               | 0.0037 | -2.006      |
| AV352768    |                    | 0.0004 | -2.005      |

| <b>Genbank Acc</b> | <b>GENENAME</b> | <b>P</b> | <b>Fold Change</b> |
|--------------------|-----------------|----------|--------------------|
| BC025944           | Dnmbp           | 0.0002   | -2.004             |
| BM900139           | Ablim3          | 0.0213   | -2.003             |
| AV303043           | Wnt5b           | 0.0037   | -2.002             |
| NM_011316          | Saa4            | 0.0006   | -2.002             |
